# Supplementary material for: Confronting power in low places: historical analysis of medical dominance and role-boundary negotiation between health professions in Nigeria
Source: PubMed Central journal article supplement — BMJ Glob Health. 2020 Sep 29;5(9):e003349. doi: 10.1136/bmjgh-2020-003349 (PMC7526320; doi:10.1136/bmjgh-2020-003349), 2020-09-29
Supplement: bmjgh-2020-003349supp001.pdf [file bmjgh-2020-003349supp001.pdf]

## Guidance document for critically appraising non-scholarly documentary sources

| Scott criteria     | AACODS criteria/questions                                                                                                                                                                                                                                                                                                                                                                                                                                                                                                                                                                                                                                                                                                                                                                                                                                                              | Yes | No | Score (Scott criteria) | Notes |
|--------------------|----------------------------------------------------------------------------------------------------------------------------------------------------------------------------------------------------------------------------------------------------------------------------------------------------------------------------------------------------------------------------------------------------------------------------------------------------------------------------------------------------------------------------------------------------------------------------------------------------------------------------------------------------------------------------------------------------------------------------------------------------------------------------------------------------------------------------------------------------------------------------------------|-----|----|------------------------|-------|
| Authenticity       | <b>Authority</b><br>Identifying who is responsible for the content.<br><br><b>Individual author:</b> <ul style="list-style-type: none"> <li>Associated with a reputable organization (or association)?</li> <li>Professional qualifications or considerable experience?</li> <li>Produced/published other work (grey/black) in the field?</li> <li>Recognised expert, identified in other sources?</li> <li>Cited by others? (use Google Scholar as a quick check)</li> <li>Higher degree student under "expert" supervision?</li> </ul> <b>Organization or group:</b> <ul style="list-style-type: none"> <li>Is the organization (or association) reputable?</li> <li>Is the organization (or association) an authority in the field?</li> </ul> <b>In all cases:</b> <ul style="list-style-type: none"> <li>Does the item have a detailed reference list or bibliography?</li> </ul> |     |    | 5                      |       |
|                    | <b>Date</b><br>For the item to inform your research, it needs to have a date that confirms relevance <ul style="list-style-type: none"> <li>Does the item have a clearly stated date related to content? No easily discernible date is a strong concern.</li> <li>If no date is given, but can be closely ascertained, is there a valid reason for its absence?</li> <li>Check the bibliography: have key contemporary material been included?</li> </ul>                                                                                                                                                                                                                                                                                                                                                                                                                              |     |    |                        |       |
| Credibility        | <b>Accuracy</b><br>Does the item have a clearly stated aim or brief? <ul style="list-style-type: none"> <li>Is so, is this met?</li> <li>Does it have a stated methodology?</li> <li>If so, is it adhered to?</li> <li>Has it been peer-reviewed?</li> <li>Has it been edited by a reputable authority?</li> <li>Supported by authoritative, documented references or credible sources?</li> </ul>                                                                                                                                                                                                                                                                                                                                                                                                                                                                                     |     |    | 5                      |       |
| Representativeness | <b>Accuracy</b> <ul style="list-style-type: none"> <li>Is it representative of work in the field?</li> </ul>                                                                                                                                                                                                                                                                                                                                                                                                                                                                                                                                                                                                                                                                                                                                                                           |     |    | 5                      |       |

|                |                                                                                                                                                                                                                                                                                                                                                                                                                                                                                                                                                                                                        |  |  |   |  |
|----------------|--------------------------------------------------------------------------------------------------------------------------------------------------------------------------------------------------------------------------------------------------------------------------------------------------------------------------------------------------------------------------------------------------------------------------------------------------------------------------------------------------------------------------------------------------------------------------------------------------------|--|--|---|--|
|                | <ul style="list-style-type: none"> <li>• If No, is it a valid counterbalance?</li> <li>• Is any data collection explicit and appropriate for the research?</li> <li>• If item is secondary material (e.g. a policy brief of a technical report) refer to the original. Is it an accurate, unbiased interpretation or analysis?</li> </ul>                                                                                                                                                                                                                                                              |  |  |   |  |
| Meaning        | <b>Objectivity</b>                                                                                                                                                                                                                                                                                                                                                                                                                                                                                                                                                                                     |  |  | 5 |  |
|                | <p>It is important to identify bias, particularly if it is unstated or unacknowledged.</p> <ul style="list-style-type: none"> <li>• Opinion, expert or otherwise, is still opinion: is the author's standpoint clear?</li> <li>• Does the work seem to be balanced in presentation?</li> </ul>                                                                                                                                                                                                                                                                                                         |  |  |   |  |
|                | <b>Significance</b>                                                                                                                                                                                                                                                                                                                                                                                                                                                                                                                                                                                    |  |  |   |  |
|                | <p>This is a value judgment of the item, in the context of the relevant research area</p> <ul style="list-style-type: none"> <li>• Is the item meaningful? (this incorporates feasibility, utility and relevance)</li> <li>• Does it add context?</li> <li>• Does it enrich or add something unique to the research?</li> <li>• Does it strengthen or refute a current position?</li> <li>• Would the research area be lesser without it?</li> <li>• Is it integral, representative, typical?</li> <li>• Does it have impact? (in the sense of influencing the work or behaviour of others)</li> </ul> |  |  |   |  |
| Not applicable | <b>Coverage</b>                                                                                                                                                                                                                                                                                                                                                                                                                                                                                                                                                                                        |  |  |   |  |
|                | <p>All items have parameters which define their content coverage. These limits might mean that a work refers to a particular population group, or that it excluded certain types of publication. A report could be designed to answer a particular question, or be based on statistics from a particular survey.</p> <ul style="list-style-type: none"> <li>• Are any limits clearly stated?</li> </ul>                                                                                                                                                                                                |  |  |   |  |
